# Supplementary material for: Bidentate salicylaldiminato tin(ii) complexes and their use as lactide polymerisation initiators
Source: Royal Society of Chemistry journal article supplement (doi:10.1039/b812877d), 2009-01-01
Supplement: b812877d.pdf [file b812877d.pdf]

Supplementary Material (ESI) for Dalton Transactions

This journal is (C) The Royal Society of Chemistry 2009

## **Supplementary Material for:**

---

### **Bidentate salicylaldiminato tin(II) complexes and their use as lactide polymerisation initiators**

---

**Nonsee Nimitsirawat, Vernon C. Gibson,\* Edward L. Marshall\***

*Imperial College London, Department of Chemistry, South Kensington Campus, London SW7 2AZ, United Kingdom; E-mail: v.gibson@imperial.ac.uk; e.marshall@imperial.ac.uk*

**Mark R. J. Elsegood**

*Loughborough University, Chemistry Department, Leicestershire LE11 3TU, United Kingdom.*

### $^1\text{H}$ NMR Characterisation of complexes **2** and **3**

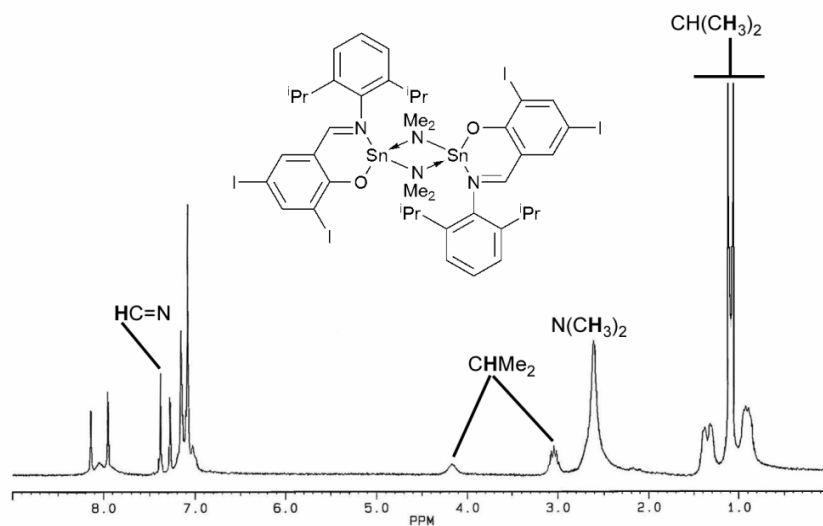

**Figure S1.** The  $^1\text{H}$  NMR spectrum of complex **2** ( $\text{C}_6\text{D}_6$ , 250 MHz, 298 K).

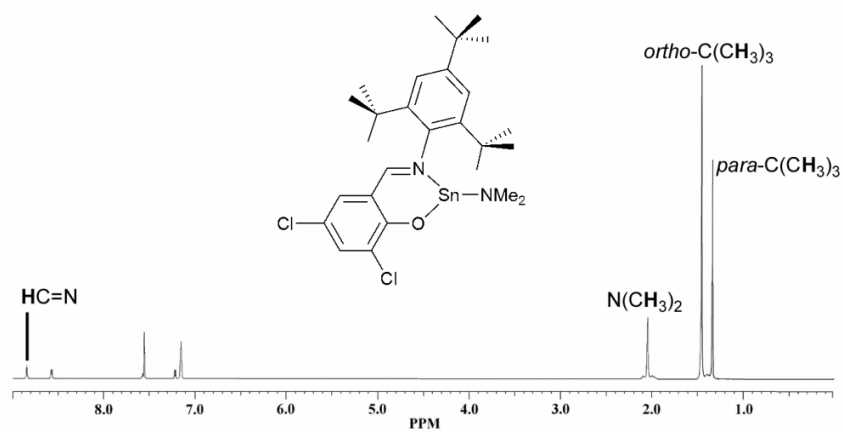

**Figure S2.** The  $^1\text{H}$  NMR spectrum of complex **3** ( $\text{C}_6\text{D}_6$ , 250 MHz, 298 K).
